# Supplementary material for: View from the bridge: a pseudo-Jahn–Teller approach to transition metal hydrosilane complexes
Source: Royal Society of Chemistry journal article supplement (doi:10.1039/b412371a), 2004-01-01
Supplement: b412371a.pdf [file b412371a.pdf]

## Supplementary Material

### **B3LYP/6-31++G\*\* TBP constrained geometry**

|    |          |          |          |
|----|----------|----------|----------|
| 6  | 1.57204  | -0.61655 | 1.26053  |
| 6  | 0.43697  | -1.48757 | 1.24412  |
| 6  | 0.31358  | -2.02978 | -0.06268 |
| 6  | 1.38164  | -1.50964 | -0.86054 |
| 6  | 2.15793  | -0.65266 | -0.04004 |
| 1  | 1.9334   | -0.05299 | 2.10927  |
| 1  | -0.23249 | -1.67331 | 2.07296  |
| 1  | -0.44024 | -2.73203 | -0.39036 |
| 1  | 1.55958  | -1.72305 | -1.90616 |
| 1  | 3.02848  | -0.093   | -0.35625 |
| 25 | 0.13144  | 0.13105  | -0.13964 |
| 6  | 0.82464  | 1.71355  | -0.73569 |
| 6  | -0.90052 | 1.00796  | 1.04318  |
| 8  | -1.47557 | 1.5511   | 1.89101  |
| 8  | 1.32935  | 2.69683  | -1.07396 |
| 14 | -2.29326 | -0.50929 | -0.84681 |
| 1  | -2.06857 | 0.15143  | -2.21539 |
| 1  | -2.51582 | -1.16377 | 0.50885  |
| 1  | -2.5579  | -1.83585 | -1.53072 |
| 1  | -3.43472 | 0.44114  | -0.57539 |

### B3LYP/6-31++G\*\* fully optimised geometry

|    |           |           |           |
|----|-----------|-----------|-----------|
| 1  | -2.014803 | -2.272621 | .207775   |
| 14 | -1.744818 | -1.328543 | -.915901  |
| 25 | .033416   | .126973   | -.087601  |
| 1  | -1.405677 | -2.196578 | -2.081025 |
| 1  | -.651632  | -.124147  | -1.472191 |
| 1  | -3.021414 | -.635673  | -1.226525 |
| 8  | -1.985258 | .525381   | 2.029709  |
| 6  | -.213397  | 1.820759  | -.658251  |
| 6  | -1.224343 | .366345   | 1.166997  |
| 8  | -.344322  | 2.915686  | -1.011059 |
| 1  | 1.995253  | 1.027125  | 1.854124  |
| 6  | 1.832899  | .275690   | 1.094150  |
| 6  | 2.183861  | .380964   | -.285454  |
| 1  | .868400   | -1.400250 | 2.226738  |
| 1  | 2.644038  | 1.238492  | -.757962  |
| 6  | 1.803230  | -.819409  | -.938168  |
| 1  | 1.921379  | -1.036218 | -1.990851 |
| 6  | 1.216356  | -1.684593 | .037590   |
| 1  | .854062   | -2.688603 | -.136287  |
| 6  | 1.241242  | -1.008886 | 1.289746  |
